# Supplementary material
Source: publisher figshare collection journal article supplement (https://frontiersin.figshare.com/ndownloader/files/24356384)
Supplement: Supplementary file [file 24356384]

## Supplementary Figures

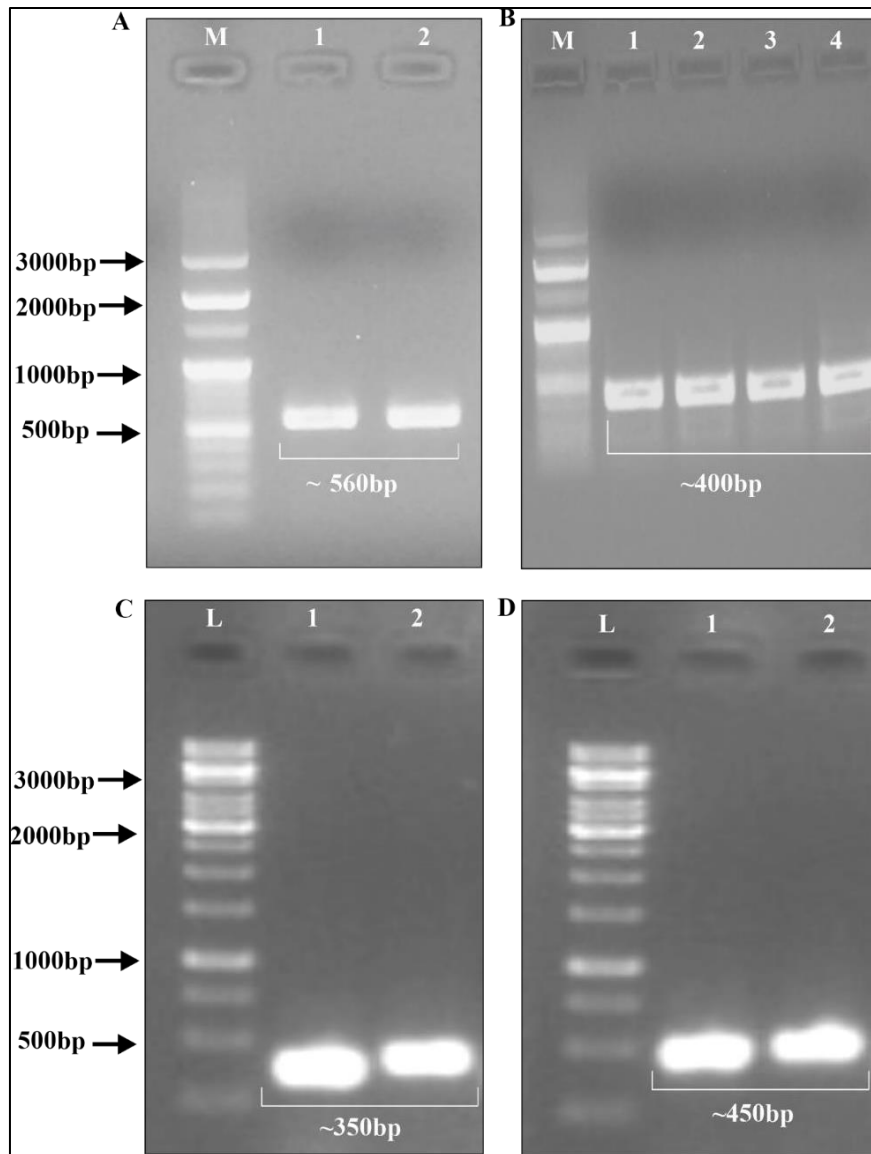

**Figure S1.** Agarose gel electrophoresis of PCR derived amplicons of four defense related genes from fungal inoculated Richa variety. (A) Lane 1 and 2 depicting that CHS gene sharply amplified (560bp) at 52.6 °C and 53.4 °C gradient temperatures; (B) SOD gene amplification (400bp) clearly visible in four lanes at 56.8 °C, 57.2 °C, 57.6 °C and 57.9 °C gradient temperatures; (C) APX gene amplicons of 350 bp in lane 1- Richa and lane 2- ICP8863 (D)  $\beta$ - 1,3-glucanases gene amplicons of 450 bp in lane 1- Richa and lane 2- ICP8863; M-1kb DNA ladder, L-100bp DNA ladder.

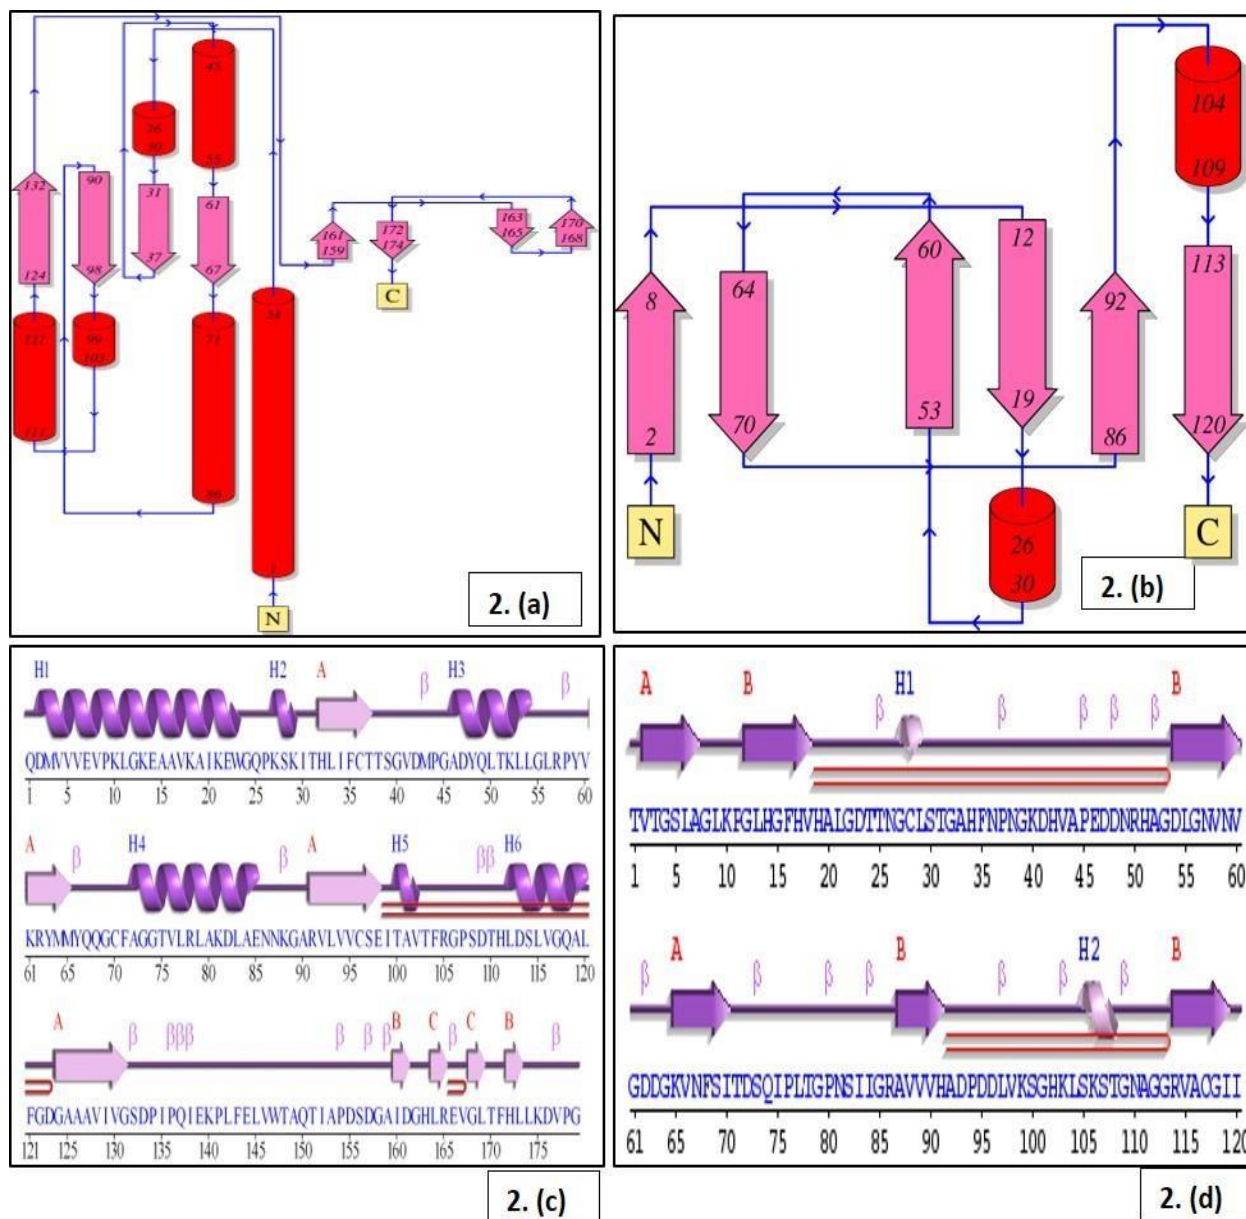

**Figure S2.** Topology of CHS (a) and SOD (b). Predicted secondary structure of CHS (c) and SOD (d); the structure consist of helices (H) and strands by the sheet A, B, C and motif having  $\beta$  helix turn and  $\beta$  hairpin loops.

### Supplementary Tables

**Table S1:** ANOVA test landraces/genotypes for their resistance or susceptibility to Fusarium wilt.

| Source of variation | Degrees of freedom | Sum of squares | Mean sum of squares | F cal  | F prob |
|---------------------|--------------------|----------------|---------------------|--------|--------|
| Replications        | 4                  | 762.019        | 190.505             | 0.472  | 0.756  |
| Genotypes           | 6                  | 43410.264      | 7235.044            | 17.935 | 0.000  |
| Error               | 24                 | 9681.737       | 403.406             | -      | -      |
| Total               | 34                 | -              | -                   | -      | -      |

**Table S2:** Statistical comparison of collected pigeonpea landraces with genotype ICP 8863 for their resistance or susceptibility to Fusarium wilt.

| Landrace name | Variance | T-Statistics |
|---------------|----------|--------------|
| Richa         | 222.194  | 1.5**        |
| Desi Nimar    | 222.178  | 3.501*       |
| Parwati       | 83.367   | 22.041       |
| Desi Tur      | 194.389  | 12.83        |
| WB-20/105     | 1749.867 | 3.207*       |

T-Table values are 2.776 and 4.604 at 0.05% and 0.01%, respectively

\*\* Not significantly different at 1 and 5% level;

\* Significantly different at 5% level

**Table S3.** Physiochemical properties of the protein CHS and SOD showing the amino acid composition.

| Amino acid |     | CHS |       | SOD |        | CBH-1 |        |
|------------|-----|-----|-------|-----|--------|-------|--------|
| Ala        | (A) | 36  | 9.30% | 11  | 7.20%  | 5     | 5.40%  |
| Arg        | (R) | 17  | 4.40% | 3   | 2.00%  | 2     | 2.20%  |
| Asn        | (N) | 13  | 3.30% | 10  | 6.60%  | 6     | 6.50%  |
| Asp        | (D) | 21  | 5.40% | 10  | 6.60%  | 7     | 7.60%  |
| Cys        | (C) | 7   | 1.80% | 2   | 1.30%  | 1     | 1.10%  |
| Gln        | (Q) | 14  | 3.60% | 3   | 2.00%  | 2     | 2.20%  |
| Glu        | (E) | 24  | 6.20% | 5   | 3.30%  | 2     | 2.20%  |
| Gly        | (G) | 30  | 7.70% | 29  | 19.10% | 9     | 9.80%  |
| His        | (H) | 7   | 1.80% | 8   | 5.30%  | 4     | 4.30%  |
| Ile        | (I) | 23  | 5.90% | 7   | 4.60%  | 3     | 3.30%  |
| Leu        | (L) | 37  | 9.50% | 11  | 7.20%  | 8     | 8.70%  |
| Lys        | (K) | 26  | 6.70% | 6   | 3.90%  | 7     | 7.60%  |
| Met        | (M) | 14  | 3.60% | 1   | 0.70%  | 4     | 4.30%  |
| Phe        | (F) | 14  | 3.60% | 5   | 3.30%  | 3     | 3.30%  |
| Pro        | (P) | 21  | 5.40% | 7   | 4.60%  | 2     | 2.20%  |
| Ser        | (S) | 20  | 5.10% | 10  | 6.60%  | 13    | 14.10% |
| Thr        | (T) | 21  | 5.40% | 11  | 7.20%  | 4     | 4.30%  |
| Trp        | (W) | 4   | 1.00% | 0   | 0.00%  | 3     | 3.30%  |
| Tyr        | (Y) | 12  | 3.10% | 0   | 0.00%  | 1     | 1.10%  |
| Val        | (V) | 28  | 7.20% | 13  | 8.60%  | 6     | 6.50%  |
| Pyl        | (O) | 0   | 0.00% | 0   | 0.00%  | 0     | 0.00%  |
| Sec        | (U) | 0   | 0.00% | 0   | 0.00%  | 0     | 0.00%  |
